# Supplementary material for: A Comprehensive Overview of Baboon Phylogenetic History
Source: MDPI journal article supplement (doi:10.3390/genes14030614), 2023-02-28
Supplement: s1 [file s1]

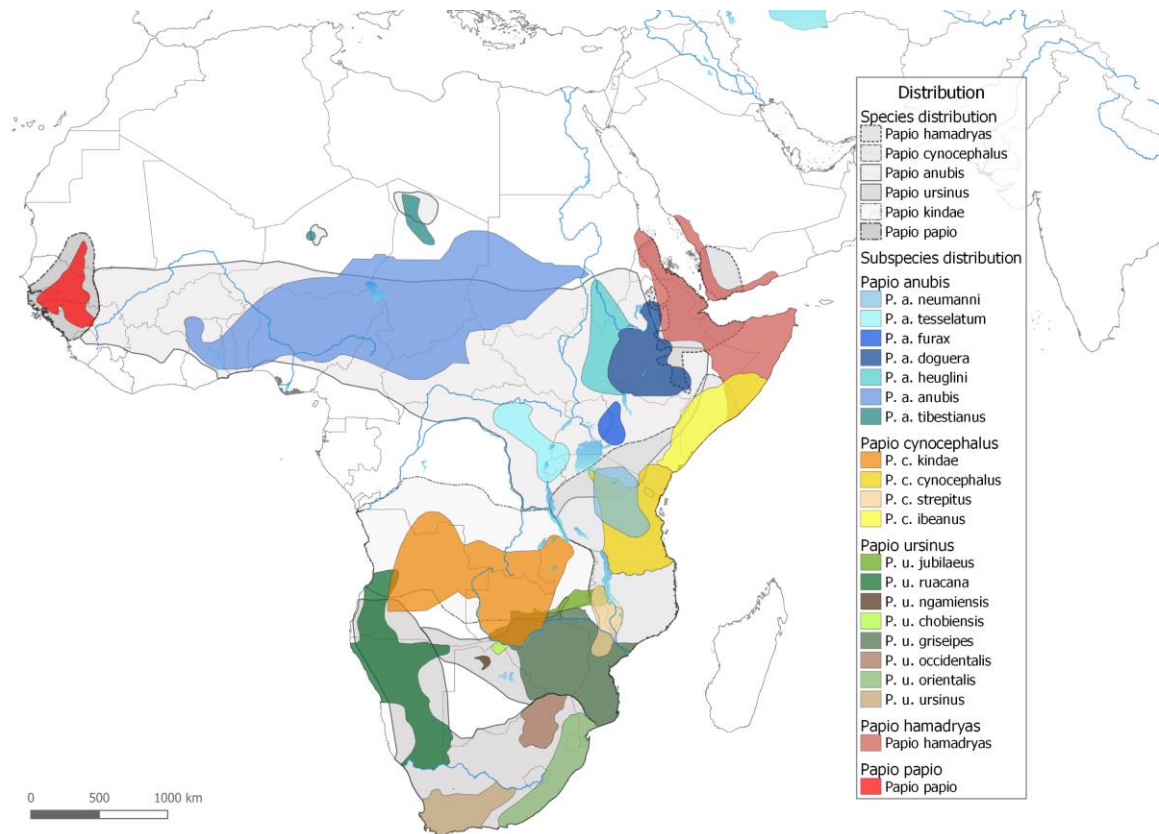

**Figure S1: Distribution of baboon subspecies according to Hill (1970).** Map created with QGIS v3.8, Species distribution shapefiles were obtained from IUCN red list (<https://www.iucnredlist.org>, last accessed: 15.10.20). Subspecies distribution was copied manually from Hill (1970). Country shapefiles were obtained from <http://www.diva-gis.org/gData> (accessed: 23.10.19) and river and lake shapefiles were obtained from WWF HydroSHEDS (<https://hydrosheds.org/>, accessed: 04.11.19).
